# Supplementary material
Source: PubMed Central journal article supplement (PMC4272447)

**Figure 1**

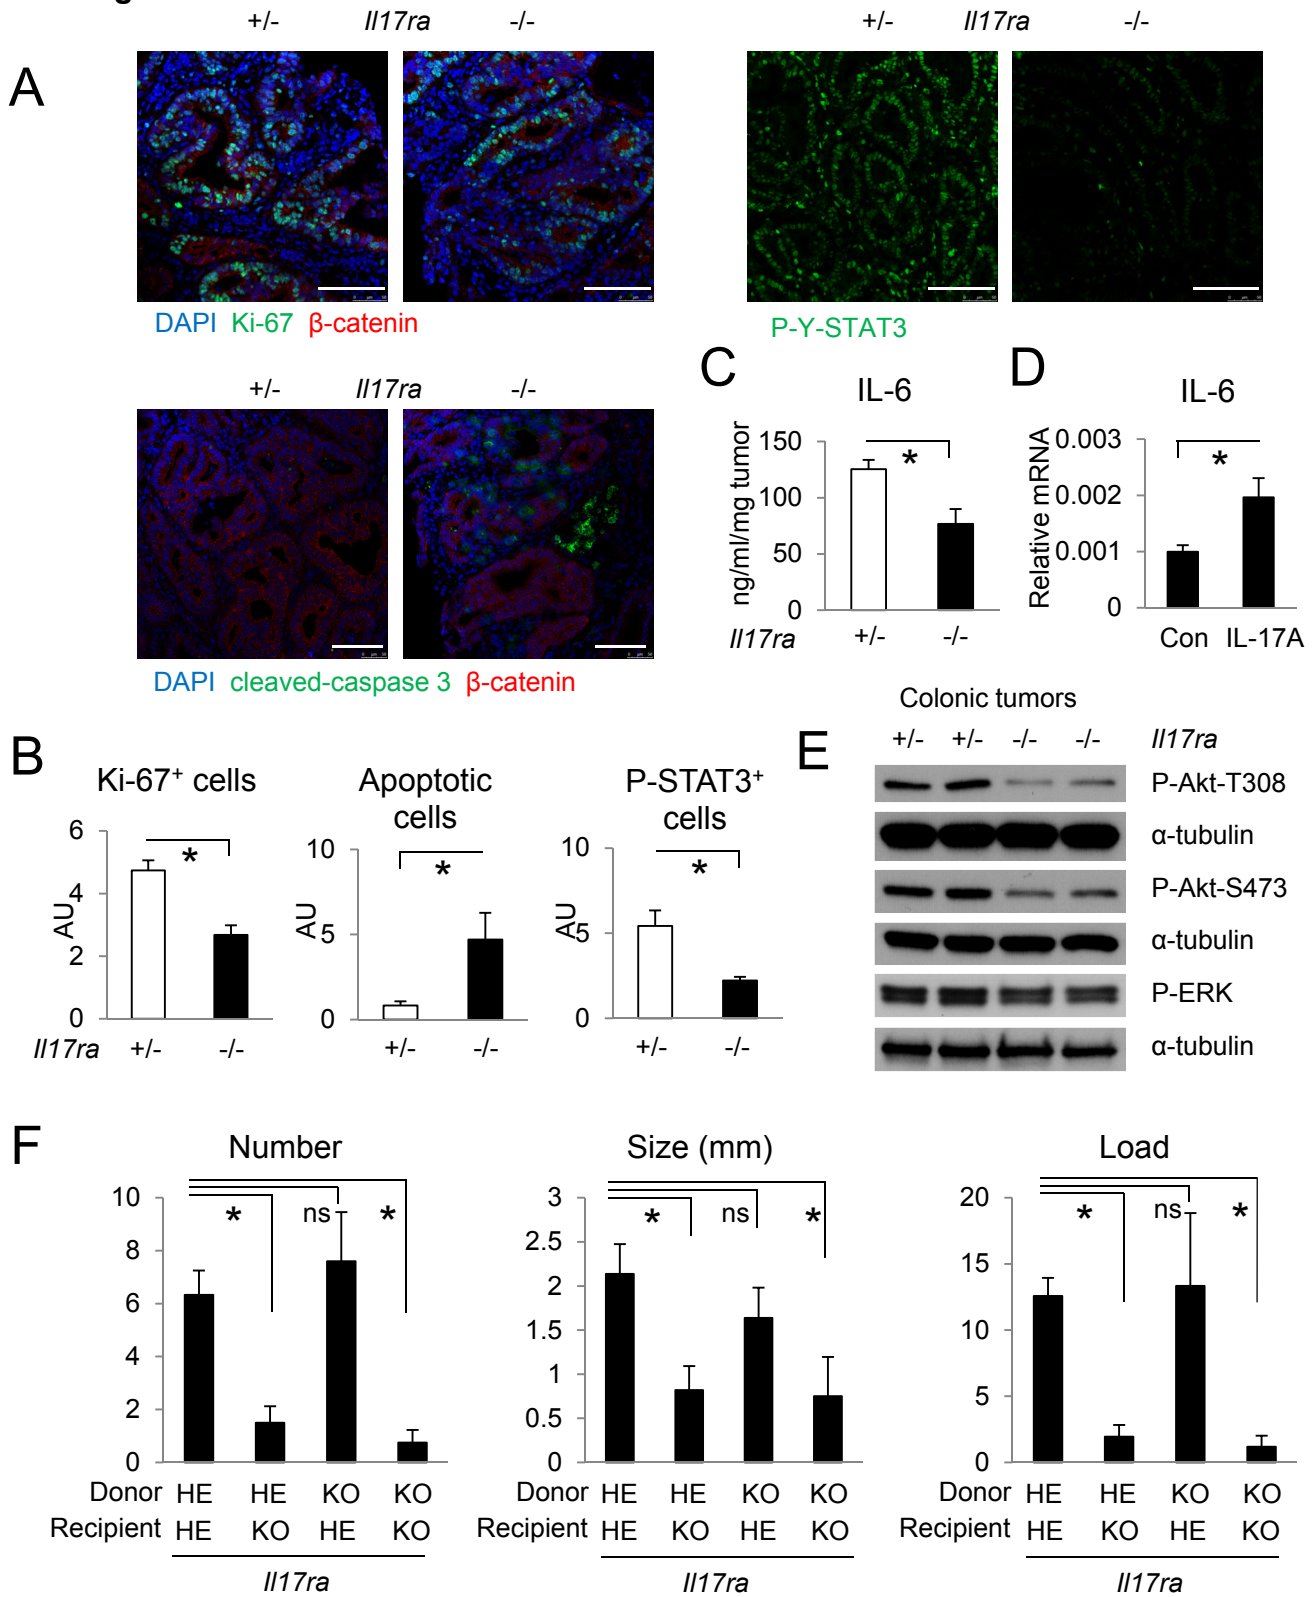

Supplement: NIHMS645387-supplement-1.pdf [file NIHMS645387-supplement-1.pdf]

**Figure 2**

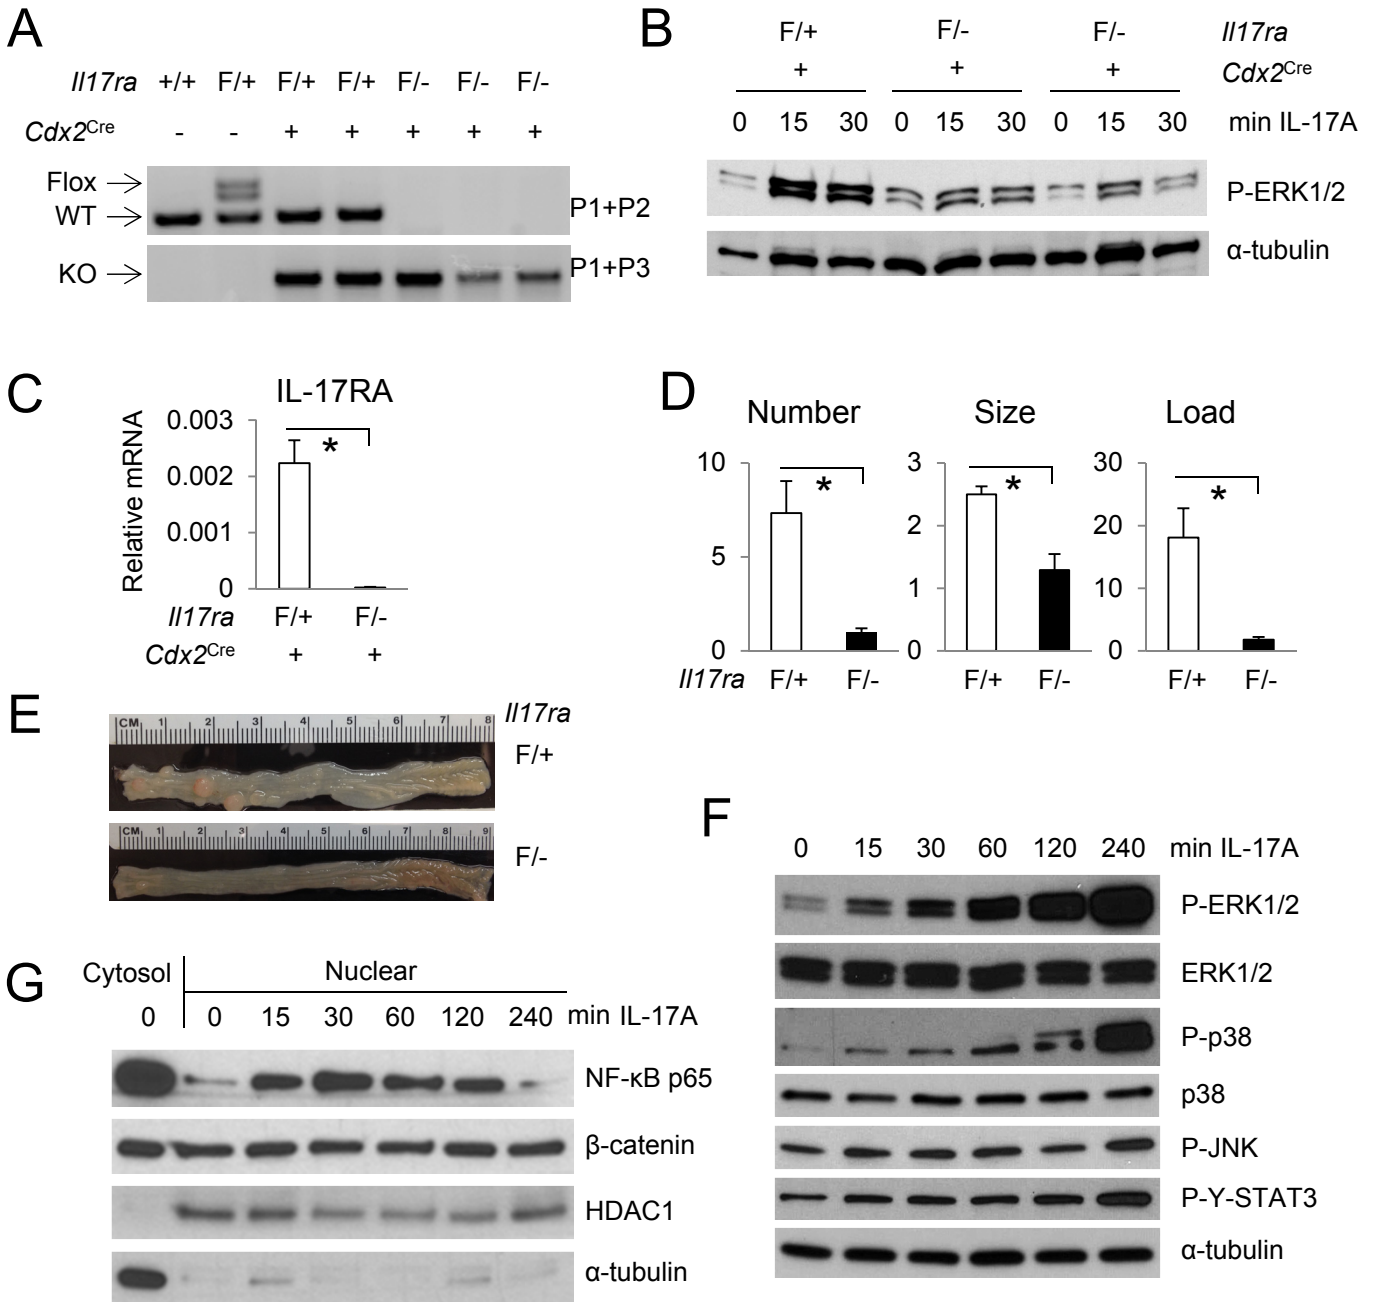

Supplement: NIHMS645387-supplement-2.pdf [file NIHMS645387-supplement-2.pdf]

Figure 3

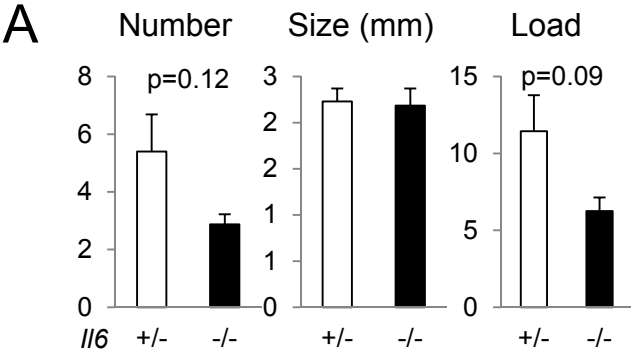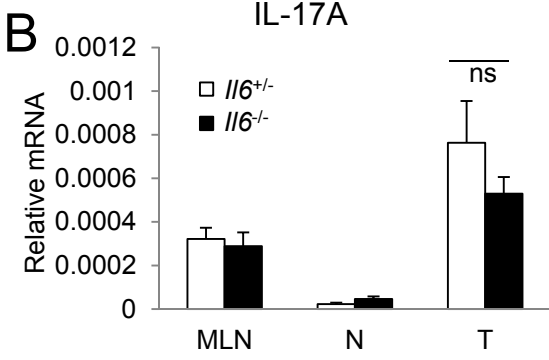

Supplement: NIHMS645387-supplement-3.pdf [file NIHMS645387-supplement-3.pdf]

**Figure 4**

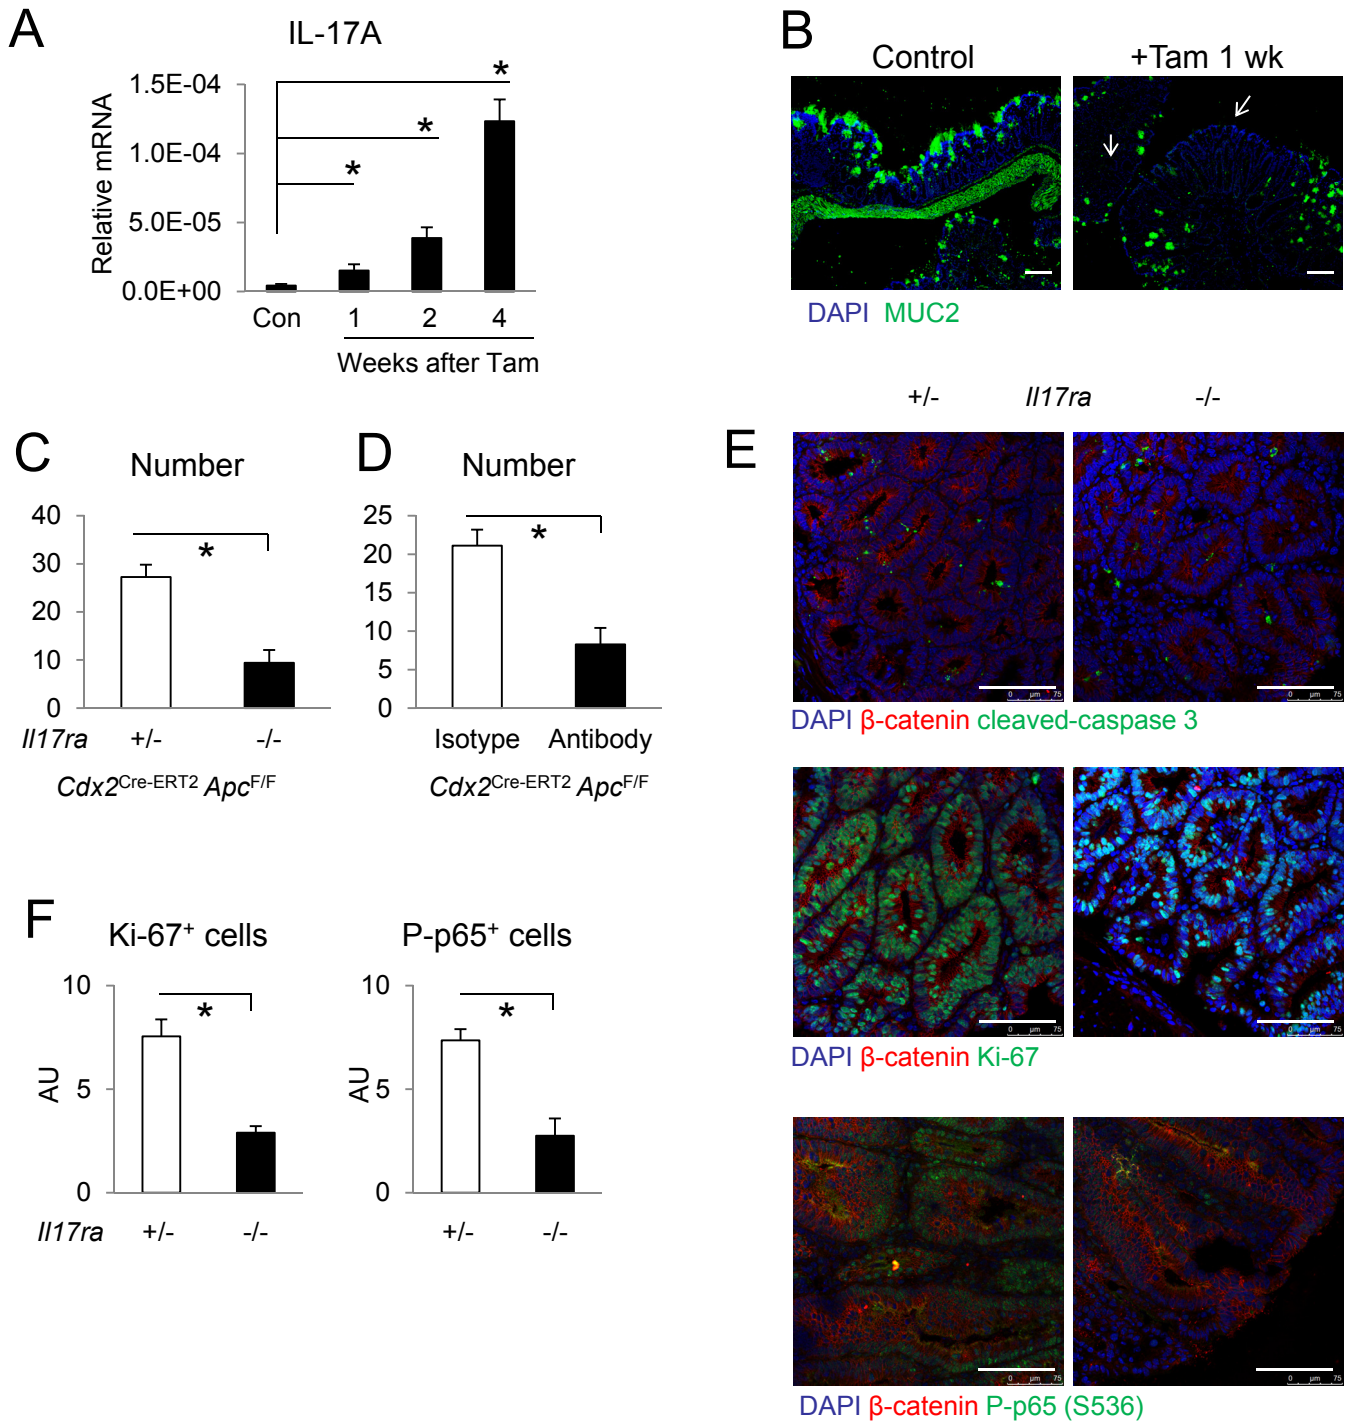

Supplement: NIHMS645387-supplement-4.pdf [file NIHMS645387-supplement-4.pdf]

**Figure 5**

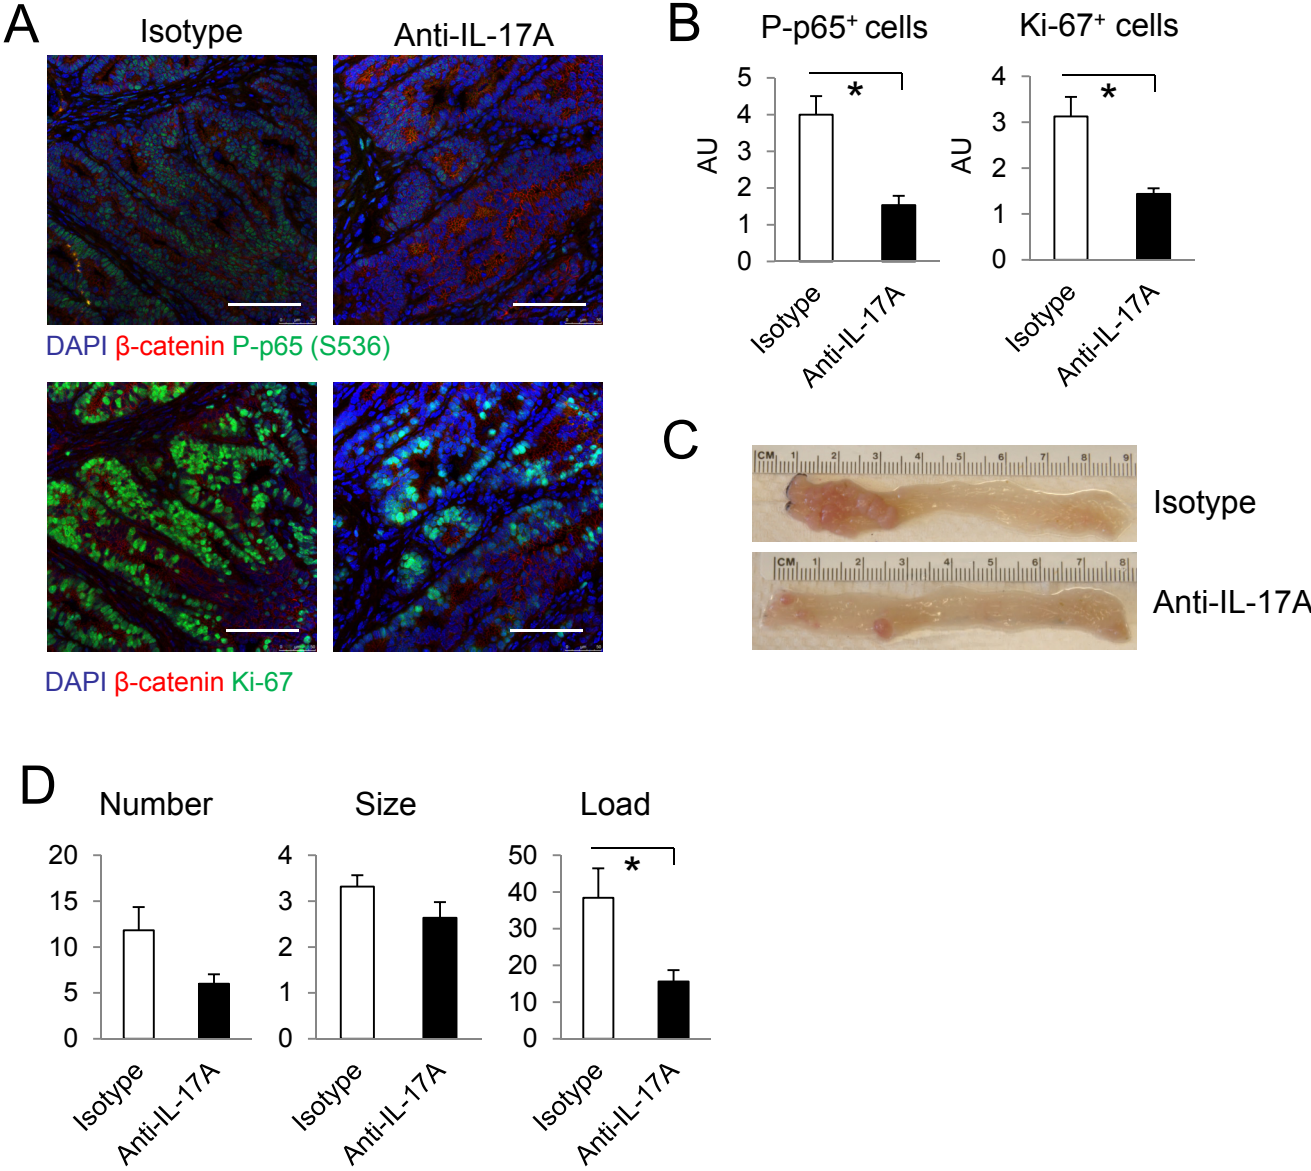

Supplement: NIHMS645387-supplement-5.pdf [file NIHMS645387-supplement-5.pdf]

**Figure 6**

**A**

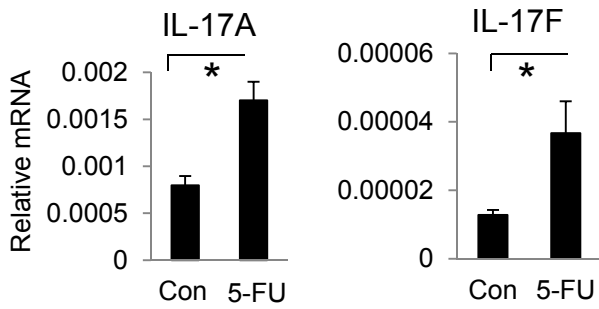

**C**

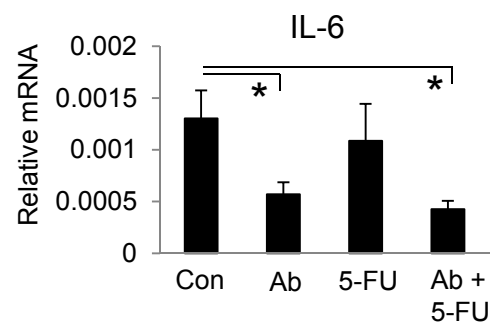

**B**

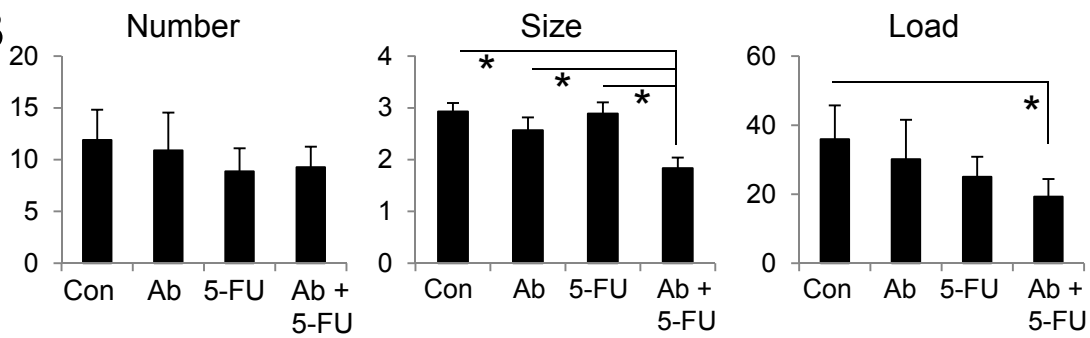

**D**

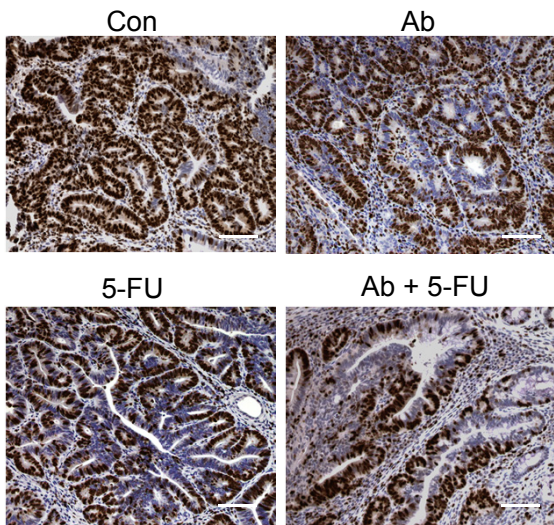

Ki-67

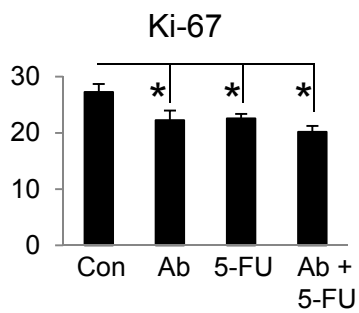

**E**

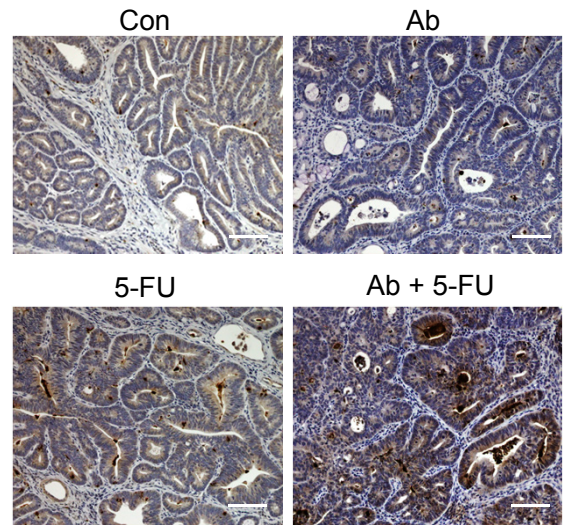

Cleaved caspase 3

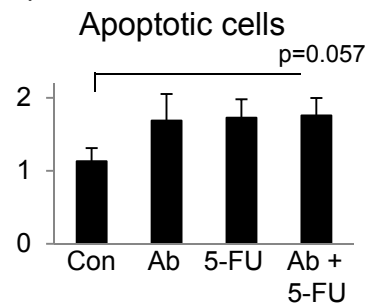

Supplement: NIHMS645387-supplement-6.pdf [file NIHMS645387-supplement-6.pdf]
